# Supplementary material for: Baculovirus Utilizes Cholesterol Transporter NIEMANN–Pick C1 for Host Cell Entry
Source: Front Microbiol. 2019 Dec 5;10:2825. doi: 10.3389/fmicb.2019.02825 (PMC6906155; doi:10.3389/fmicb.2019.02825)
Supplement: Supplementary file 2 [file Table_1.XLSX]

## Sheet: Sheet1
TABLE S1 Sequences of primers used in this study.
Primer name	Primer sequence*	Amplicon size (bp)
Recombinant BmNPV primers
pFastBacHTB-EGFP-F	5' CGGAATTCGTGAGCAAGGGCGAGGAG 3'	731
pFastBacHTB-EGFP-R	5' CCGCTCGAGCTTGTACAGCTCGTCCAT 3'
BmNPC1 coding region amplification primers
NPC1-FL-F	5' ATGGCTGATCGCGGAAGTTTT 3'	4005
NPC1-FL-R	5' TCACGAGGGTATCGAGTCGAA 3'
BmNPC1 prokaryotic expression primers
NPC1-A-PE-F	5' CGGATCCGATGGTCACTGCATATGGTA 3'	715
NPC1-A-PE-R	5' CCGCTCGAGGGAGAACGGCTGCGGGGGCG 3'
NPC1-I-PE-F	5' CGGATCCATCGGACTAGACCAAGAGCT 3'	829
NPC1-I-PE-R	5' CCCAAGCTTGAGCACGAAGGTGACGAAGA 3'
RNAi vector construction primers
npc1-RNAi-a-F	5' CGGGATCCCGCCACCTACTACCAGAG 3'	332
npc1-RNAi-a-R	5' CCCCCGGGCATAGTGATGGTCACTAC 3'
npc1-RNAi-b-F	5' CGGGATCCAACTCGACAACAGGTTCG 3'	387
npc1-RNAi-b-R	5' CCCCCGGGGCACAGCAAGTTCTGCAC 3'
CRISPR/Cas9 system primers
gRNA-1-F	5' AAGTGTAGGGCGTGTACCCATCGA 3'	24
gRNA-1-R	5' AAACTCGATGGGTACACGCCCTAC 3'
gRNA-2-F	5' AAGTGTAGAGAGTACTCACCAACG 3'	24
gRNA-2-R	5' AAACCGTTGGTGAGTACTCTCTAC 3'
Left-HR-F	5' GGGCCCTTTATGCGGTATGTTAGC 3'	1050
Left-HR-R	5' CTCGAGAAGTTGAATTTCGATTGG 3'
Right-HR-F	5' CCCGGGCACGTCAGTGGCCTTATGTTAATCT 3'	1463
Right-HR-R	5' CCGCGGGAATGCATTAATGGATCCACATGTT 3'
ie1-DsRed-sv40-F	5' CTCGAGATCGATGTCTTTGTGATG 3'	1535
ie1-DsRed-sv40-R	5' GAATTCTAAGATACATTGATGAGT 3'
A3-neo-sv40-F	5' GAATTCCTCAAGCTTGATGCGCGTTA 3'	1888
A3-neo-sv40-R	5' CCCGGGTAAGATACATTGATGAGT 3'
Knock out detect primers
KO-detect-left arm-F	5' CCGTGCGTATGCAGTAGG 3'	1608
KO-detect-left arm-R	5' CCGTGCGTATGCAGTAGG 3'
KO-detect-right arm-F	5' TCTCCTGTCATCTCACCTTGCTCC 3'	2042
KO-detect-right arm-R	5' CTGCCATAACCCTGCCTGCCTTTT 3'
qPCR primers
BmNPC1-q-F	5' AGCCAAAGGAGGTTATTCG 3'	139
BmNPC1-q-R	5' GCAGGCCATTCCACAGATC 3'
BmRPL3-q-F	5'CGGTGTTGTTGGATACATTGAG 3'	161
BmRPL3-q-R	5'GCTCATCCTGCCATTTCTTACT 3'
GP41-q-F	5'AGCGGTTTGAATCGGAGGAGAC 3'	283
GP41-q-R	5'TTGAACGGTAACGGAATGGGAA 3'
BmGAPHG-q-F	5'CATTCCGCGTCCCTGTTGCTAAT 3'	103
BmGAPHG-q-R	5'GCTGCCTCCTTGACCTTTTGC 3'
Cell-free expression system primers
BmNPC1-IVT-A-F	GGAATTCATTCCTTCATCTTATCGA	668
BmNPC1-IVT-A-R	GCGCGTCGACGCCGTCGAAGCCCGCGAT
BmNPC1-IVT-C-F	GCGCCATATGACCGACCCCGTGGAGCTG	722
BmNPC1-IVT-C-R	GCGCGTCGACGGACTCGCGGTCCAGCTC
BmNPC1-IVT-I-F	GGAATTCATCGGACTAGACCAAGAG	830
BmNPC1-IVT-I-R	GCGCGTCGACGAGCACGAAGGTGACGAAGA
GP64-IVT-F	GGAATTCCTACTAGTAAATCAGTCA	1514
GP64-IVT-R	GCGCGTCGACTTACGAAGTCAATTTGGCGGC
Yeast two-hybrid system primers
NPC1-A -yeast–F	GGAATTCCATATGGCTGATCGCGGAAGTTTT	829
NPC1-A -yeast–R	TCCCCCGGGGCCGTCGAAGCCCGCGAT
NPC1-C -yeast–F	GGAATTCCATATGACCGACCCCGTGGAGCTG	724
NPC1-C -yeast–R	TCCCCCGGGGGACTCGCGGTCCAGCTC
NPC1-I-yeast-F	GGAATTCCATATGATCGGACTAGACCAAGAG	787
NPC1-I-yeast-R	TCCCCCGGGCTTGAGGGTGTCGGACCA
GP64-yeast-F	GGAATTCCATATGATGCTACTAGTAAATCAG	1519
GP64-yeast-R	TCCCCCGGGCGAAGTCAATTTGGCGGC
* (Underline indicates restriction enzyme sites).
